# Supplementary material for: Identification of long regulatory elements in the genome of Plasmodium falciparum and other eukaryotes
Source: PLOS journal article supplement (doi:10.1371/journal.pcbi.1008909), 2021-04-16
Supplement: S9 (10.1371/journal.pcbi.1008909.s009) [file journal.pcbi.1008909.s009]

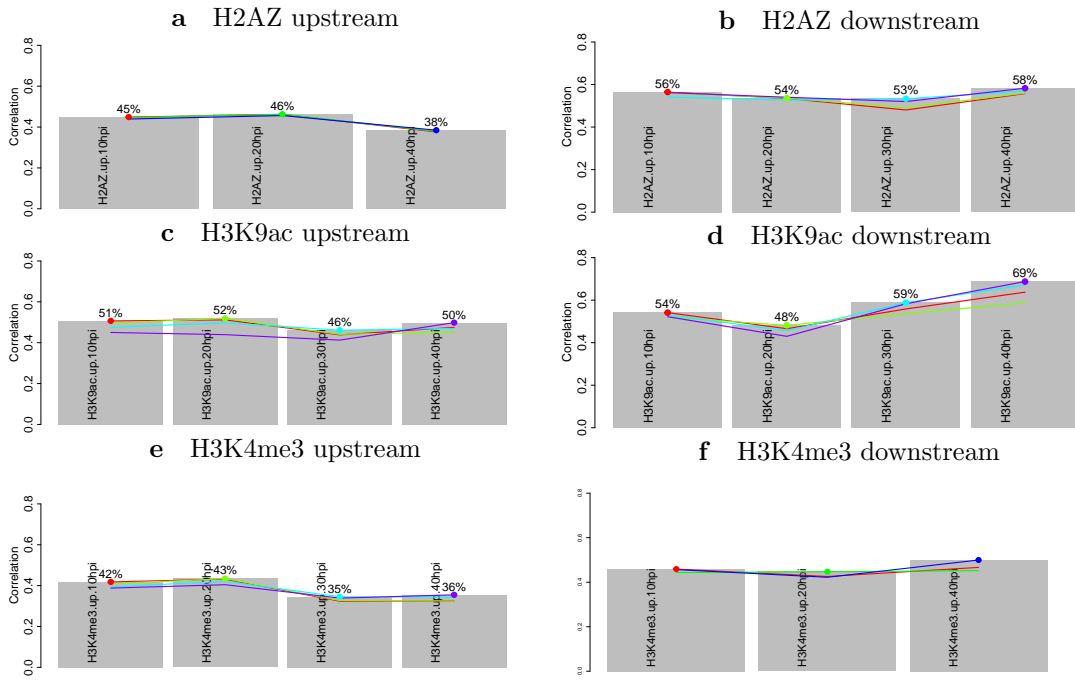

**Figure S9: DExTER accuracy for predicting H2AZ, H3K9ac and H3K4me3 histone marks.** Grey charts represent the accuracy, measured as the correlation between predicted and observed histone mark signal, on 4 time-points. Colored curves summarize the accuracy of a model learned on a specific time point when used to predict other time points of the same series.
